# Supplementary material for: Label-free detection of Giardia lamblia cysts using a deep learning-enabled portable imaging flow cytometer
Source: Royal Society of Chemistry journal article supplement (doi:10.1039/d0lc00708k), 2020-01-01
Supplement: d0lc00708k1.pdf [file d0lc00708k1.pdf]

# Supplementary materials

for

## **Label-free detection of *Giardia lamblia* cysts using a deep learning-enabled portable imaging flow cytometer**

**Zoltán Göröcs<sup>1,2,3</sup>, David Baum<sup>1</sup>, Fang Song<sup>1</sup>, Kevin DeHaan<sup>1,2,3</sup>, Hatice Ceylan Koydemir<sup>1,2,3</sup>, Yunzhe Qiu<sup>1</sup>, Zilin Cai<sup>1</sup>, Thamira Skandakumar<sup>2</sup>, Spencer Peterman<sup>2</sup>, Miu Tamamitsu<sup>1</sup>, and Aydogan Ozcan<sup>1,2,3,\*</sup>**

<sup>1</sup>Electrical and Computer Engineering Department, <sup>2</sup>Bioengineering Department, and <sup>3</sup>California NanoSystems Institute (CNSI)

University of California, Los Angeles, CA, 90095, USA

\*ozcan@ucla.edu

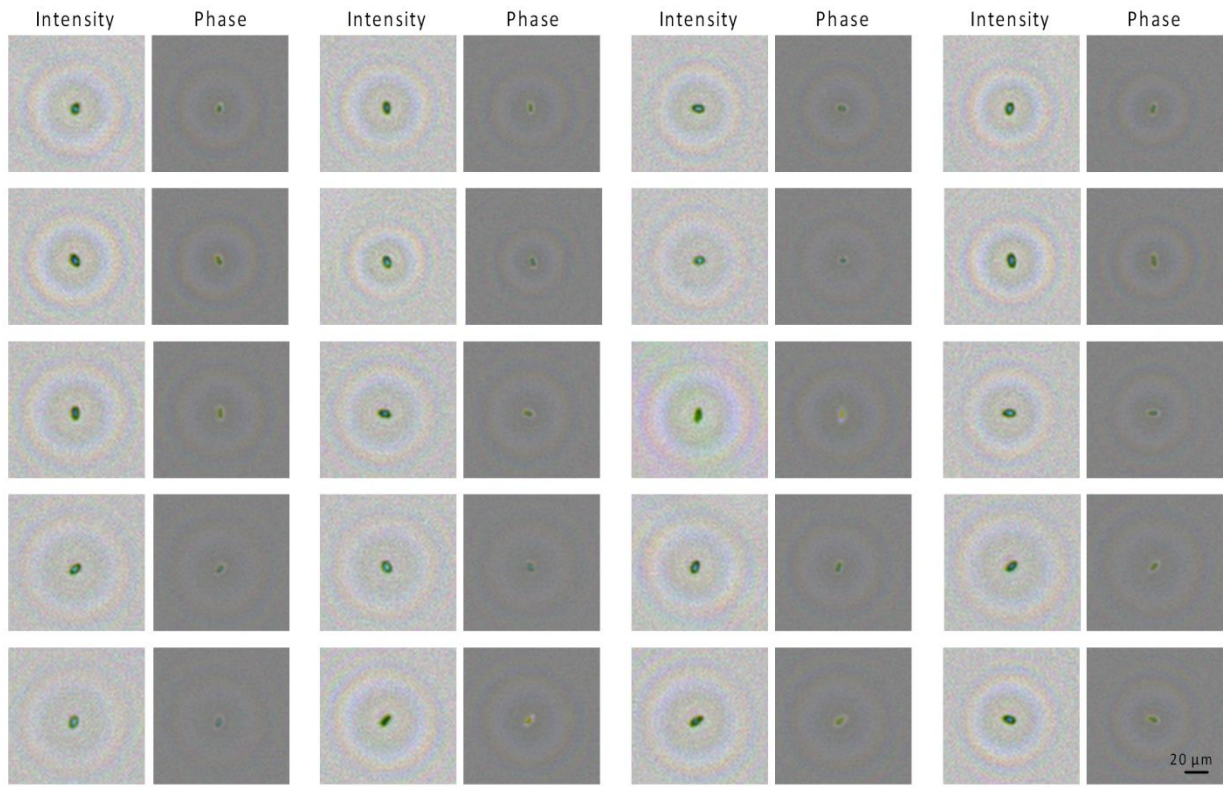

**Supplementary Figure S1:** Examples of the objects imaged by our flow cytometer that are classified as *Giardia* cysts by the trained convolutional neural network.

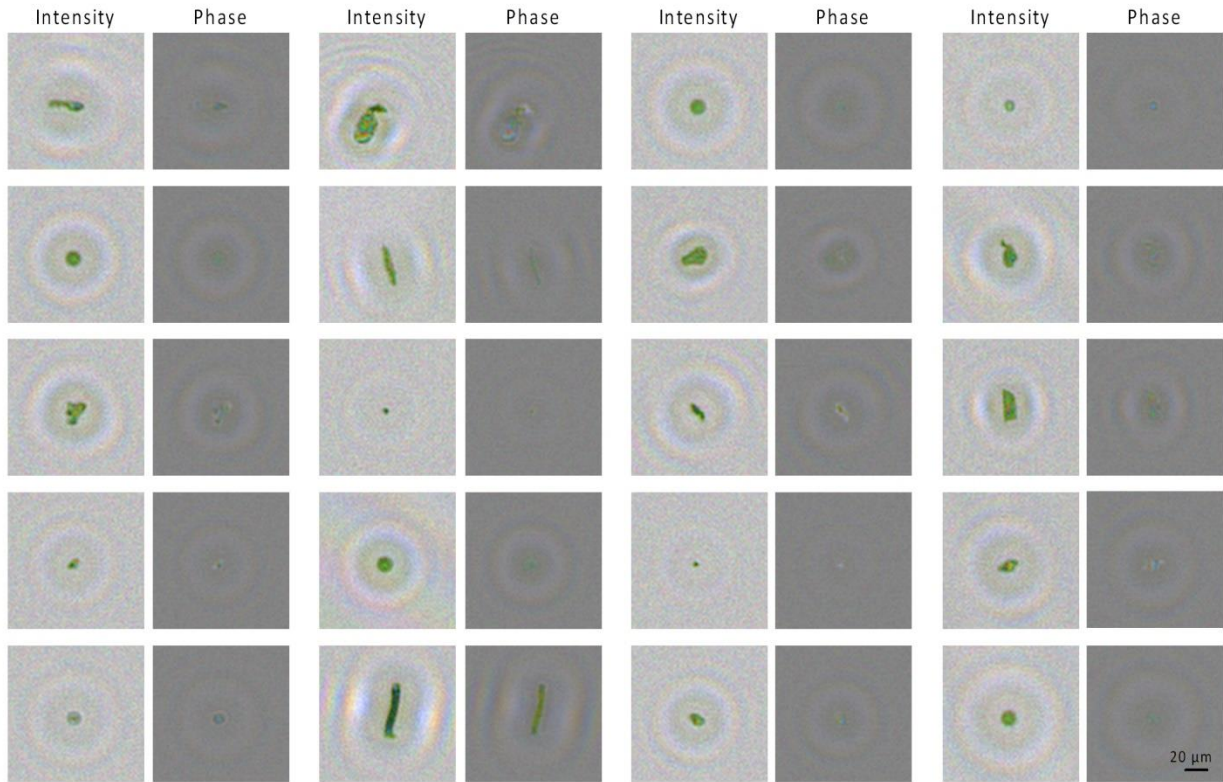

**Supplementary Figure S2:** Examples of the objects imaged by our flow cytometer that are classified as non-*Giardia* by the trained convolutional neural network.

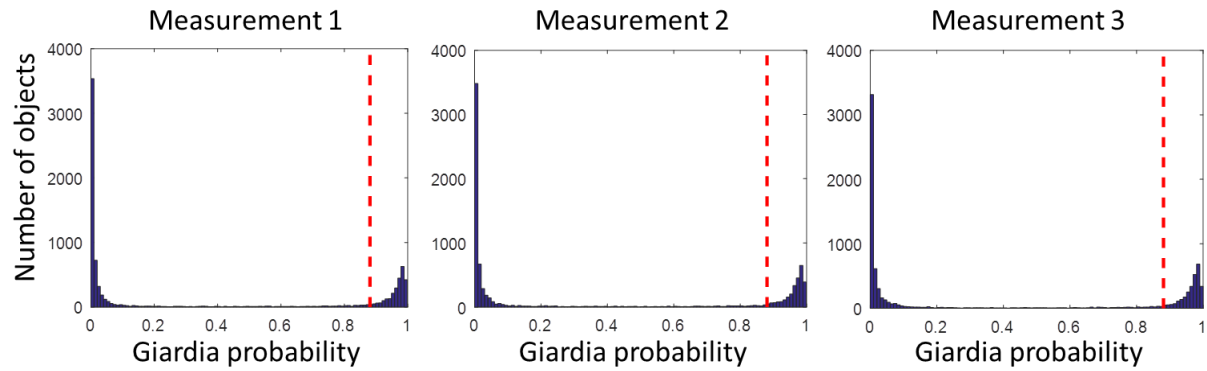

**Supplementary Figure S3:** Histograms of the probability of each object being a *Giardia* cyst, automatically calculated by the neural network during the repeatability measurements (see Figure 5 of the main text). The dashed red line on each histogram indicates the probability above which an object is classified as a *Giardia* cyst (see Equation 3 of the main text). These histograms demonstrate that the network output probabilities are consistent across the three repeatability runs.
